# Supplementary material for: Epidemiology and Association Rules Analysis for Pulmonary Tuberculosis Cases with Extrapulmonary Tuberculosis from Age and Gender Perspective: A Large-Scale Retrospective Multicenter Observational Study in China
Source: Hindawi journal article supplement (doi:10.1155/2023/5562495), 2023-07-31
Supplement: f1 [file 5562495.f1.pdf]

## Supplementary Appendix

1.0 Supplementary Figure

2.0 Supplementary Tables

1.0 Supplementary Figure

Figure S1. The age-gender percent-bar-graph of patients with concurrent PTB-EPTB

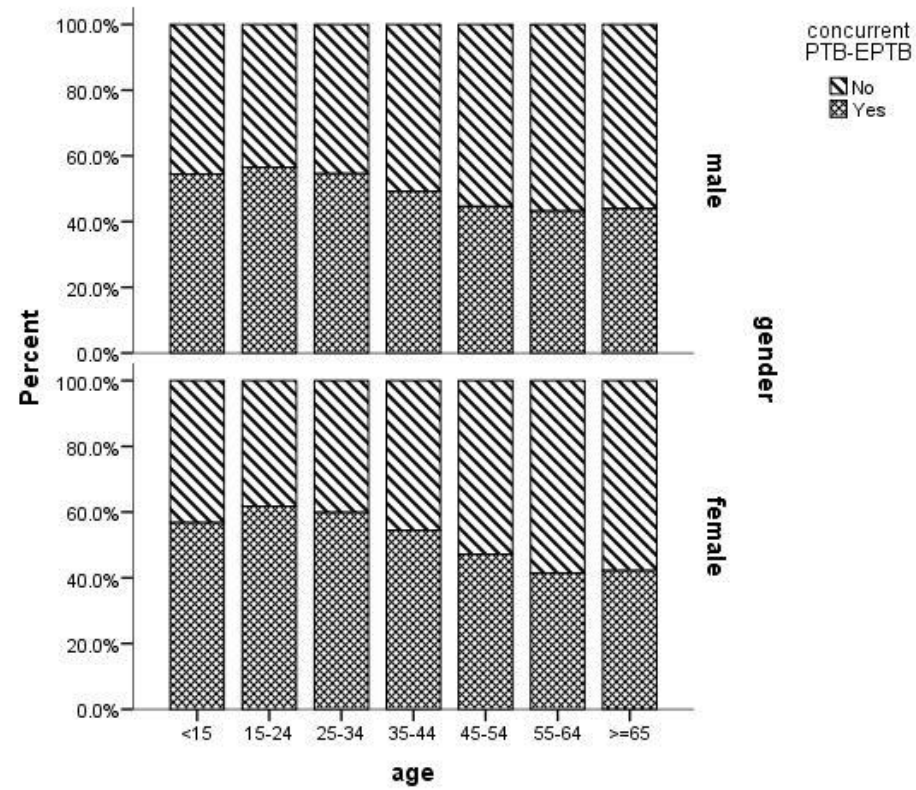

## 2.0 Supplementary Tables

Table S1. The TOP 20 most common of PTB concurrent EPTB

Table S2. The associations rules of concurrent PTB and EPTB in males (Minsupport = 0.02%, Minconfidence = 60%)

Table S3. The association rules of concurrent PTB and EPTB in females (Minsupport = 0.02%, Minconfidence = 40%)

Table S4. The association rules of concurrent PTB and EPTB in patients aged <15 years (Minsupport = 0.02%, Minconfidence = 3.0%)

Table S5. The association rules of concurrent PTB and EPTB in patients aged 15-24years (Minsupport = 0.02%, Minconfidence = 20%)

Table S6. The association rules of concurrent PTB and EPTB in patients aged 25-34 years (Minsupport = 0.02%, Minconfidence = 20%)

Table S7. The association rules of concurrent PTB and EPTB in patients aged 35-44 years (Minsupport = 0.02%, Minconfidence = 15%)

Table S8. The association rules of concurrent PTB and EPTB in patients aged 45-54 years (Minsupport = 0.02%, Minconfidence = 15%)

Table S9. The association rules of concurrent PTB and EPTB in patients aged 55-64 years (Minsupport = 0.02%, Minconfidence = 15%)

Table S10. The association rules of concurrent PTB and EPTB in patients aged  $\geq 65$  years (Minsupport = 0.02%, Minconfidence = 15%)

Table S1. The TOP 20 most common of PTB with concurrent EPTB

| TOP | PTB with concurrent EPTB                                    | Frequency | Proportion(95%CI)<br>(%) |
|-----|-------------------------------------------------------------|-----------|--------------------------|
| 1   | PTB with concurrent tuberculous pleurisy                    | 67400     | 15.3538(15.2473-15.4608) |
| 2   | PTB with concurrent bronchial tuberculosis                  | 27549     | 6.2757 (6.2041-6.3479)   |
| 3   | PTB with concurrent tuberculous meningitis                  | 9809      | 2.23 45(2.1910-2.2787)   |
| 4   | PTB with concurrent tuberculous lymphadenitis of neck       | 6966      | 1.5869(1.5501-1.6243)    |
| 5   | PTB with concurrent tuberculous peritonitis                 | 5733      | 1.3060(1.2726-1.3400)    |
| 6   | PTB with concurrent tuberculous empyema                     | 3783      | 0.8618(0.8346-0.8896)    |
| 7   | PTB with concurrent tuberculous pericarditis                | 3399      | 0.7743(0.7486-0.8007)    |
| 8   | PTB with concurrent intestinal tuberculosis                 | 3380      | 0.7700(0.7443-0.7963)    |
| 9   | PTB with concurrent tuberculous polyserositis               | 2884      | 0.6570(0.6333-0.6813)    |
| 10  | PTB with concurrent tuberculosis of mediastinal lymph nodes | 2701      | 0.6153(0.5924-0.6389)    |
| 11  | PTB with concurrent lumbar vertebra tuberculosis            | 2564      | 0.5841(0.5618-0.6071)    |
| 12  | PTB with concurrent thoracic vertebra tuberculosis          | 2446      | 0.5572(0.5354-0.5797)    |
| 13  | PTB with concurrent chest wall tuberculosis                 | 2243      | 0.5110(0.4901-0.5325)    |
| 14  | PTB with concurrent pharyngeal /laryngeal tuberculosis      | 2173      | 0.4950 (0.4745-0.5162)   |
| 15  | PTB with concurrent renal tuberculosis                      | 1202      | 0.2738(0.2586-0.2897)    |
| 16  | PTB with concurrent tuberculosis of hilar lymph nodes       | 837       | 0.1907(0.1780-0.2040)    |
| 17  | PTB with concurrent pelvic tuberculosis                     | 785       | 0.1788 (0.1665-0.1918)   |
| 18  | PTB with concurrent tuberculosis of axillary lymph nodes    | 593       | 0.1351(0.1244-0.1464)    |
| 19  | PTB with concurrent knee joint tuberculosis                 | 468       | 0.1066(0.0972-0.1167)    |
| 20  | PTB with concurrent tuberculosis of abdominal lumph nodes   | 432       | 0.0 984(0.0894-0.1081)   |

%=frequency\*100%/438979

The TOP 20 most common of concurrent EPTB and PTB were listed in table S1, sort by cases. The number of PTB concurrent with tuberculous pleurisy, bronchial tuberculosis, tuberculous meningitis, tuberculous lymphadenitis of neck and tuberculous peritonitis were all more than 5000 cases.

Table S2. The associations rules of concurrent PTB and EPTB in males (Minsupport = 0.02%, Minconfidence = 60%)

| Consequent | Antecedent                                                | ID | Instances | Support (%) | Confidence (%) | Lift  |
|------------|-----------------------------------------------------------|----|-----------|-------------|----------------|-------|
| male       | tuberculous empyema with concurrent PTB                   | 1  | 3783      | 0.86        | 77.69          | 1.20* |
| male       | costal tuberculosis with concurrent PTB                   | 2  | 88        | 0.02        | 75.00          | 1.16* |
| male       | tuberculous pleurisy with concurrent PTB                  | 3  | 67400     | 15.35       | 70.63          | 1.09* |
| male       | wrist joint tuberculosis with concurrent PTB              | 4  | 147       | 0.03        | 70.07          | 1.08* |
| male       | adrenal tuberculosis with concurrent PTB                  | 5  | 156       | 0.04        | 69.87          | 1.08* |
| male       | hip joint tuberculosis with concurrent PTB                | 6  | 339       | 0.08        | 69.32          | 1.07* |
| male       | tuberculosis of abdominal lumph nodes with concurrent PTB | 7  | 432       | 0.10        | 66.67          | 1.03* |
| male       | tuberculous abscess of psoas major with concurrent PTB    | 8  | 169       | 0.04        | 66.27          | 1.02* |
| male       | intestinal tuberculosis with concurrent PTB               | 9  | 3380      | 0.77        | 66.07          | 1.02* |
| male       | knee joint tuberculosis with concurrent PTB               | 10 | 468       | 0.11        | 66.03          | 1.02* |
| male       | pharyngeal /laryngeal tuberculosis with concurrent PTB    | 11 | 2173      | 0.50        | 65.21          | 1.01* |
| male       | vocal cord tuberculosis with concurrent PTB               | 12 | 97        | 0.02        | 64.95          | 1.00  |
| male       | chest wall tuberculosis with concurrent PTB               | 13 | 2243      | 0.51        | 64.11          | 0.99  |
| male       | tuberculous pericarditis with concurrent PTB              | 14 | 3399      | 0.77        | 62.90          | 0.97  |
| male       | nasal tuberculosis with concurrent PTB                    | 15 | 107       | 0.02        | 62.62          | 0.97  |
| male       | cervical vertebra tuberculosis with concurrent PTB        | 16 | 155       | 0.04        | 62.58          | 0.97  |
| male       | lumbar vertebra tuberculosis with concurrent PTB          | 17 | 2564      | 0.58        | 62.56          | 0.97  |
| male       | thoracic vertebra tuberculosis with concurrent PTB        | 18 | 2446      | 0.56        | 62.31          | 0.96  |
| male       | tuberculous polyserositis with concurrent PTB             | 19 | 2884      | 0.66        | 62.10          | 0.96  |

|      |                                              |    |     |      |       |      |
|------|----------------------------------------------|----|-----|------|-------|------|
| male | tuberculous myelitis with concurrent PTB     | 20 | 163 | 0.04 | 61.96 | 0.96 |
| male | brain tuberculoma with concurrent PTB        | 21 | 203 | 0.05 | 61.58 | 0.95 |
| male | elbow joint tuberculosis with concurrent PTB | 22 | 97  | 0.02 | 60.82 | 0.94 |
| male | pleural tuberculoma with concurrent PTB      | 23 | 416 | 0.09 | 60.58 | 0.94 |

In order to find out most of possible association rules in male, the minimum support degree was set as 0.02%, and the minimum confidence degree was set as 60.0%. After executing the association model, 23 association rules, including 4 rules whose confidence degree greater than 70% were obtained. In males, tuberculous empyema with concurrent PTB (77.69%) was the strongest association rule, followed by costal tuberculosis with concurrent PTB, tuberculous pleurisy with concurrent PTB, etc.

Table S3. The association rules of concurrent PTB and EPTB in females (Minsupport = 0.02%, Minconfidence = 40%)

| Consequent | Antecedent                                                  | ID | Instances | Support (%) | Confidence (%) | Lift  |
|------------|-------------------------------------------------------------|----|-----------|-------------|----------------|-------|
| female     | bronchial tuberculosis with concurrent PTB                  | 1  | 27549     | 6.28        | 57.77          | 1.64* |
| female     | supraclavicular lymph node tuberculosis with concurrent PTB | 2  | 169       | 0.04        | 55.03          | 1.56* |
| female     | cutaneous tuberculosis with concurrent PTB                  | 3  | 392       | 0.09        | 54.85          | 1.55* |
| female     | ureteric tuberculosis with concurrent PTB                   | 4  | 92        | 0.02        | 54.35          | 1.54* |
| female     | tuberculosis of axillary lymph nodes concurrent PTB         | 5  | 593       | 0.14        | 52.28          | 1.48* |
| female     | submaxillary lymph node tuberculosis with concurrent PTB    | 6  | 123       | 0.03        | 51.22          | 1.45* |
| female     | tuberculous lymphadenitis of neck with concurrent PTB       | 7  | 6966      | 1.59        | 50.78          | 1.44* |
| female     | hepatic tuberculosis with concurrent PTB                    | 8  | 244       | 0.06        | 47.95          | 1.36* |
| female     | sacral tuberculosis with concurrent PTB                     | 9  | 95        | 0.02        | 45.26          | 1.28* |
| female     | sacroiliac joint tuberculosis with concurrent PTB           | 10 | 292       | 0.07        | 44.86          | 1.27* |
| female     | tuberculosis of hilar lymph nodes concurrent PTB            | 11 | 837       | 0.19        | 44.80          | 1.27* |
| female     | renal tuberculosis with concurrent PTB                      | 12 | 1202      | 0.27        | 44.34          | 1.25* |
| female     | shoulder joint tuberculosis with concurrent PTB             | 13 | 103       | 0.02        | 42.72          | 1.21* |
| female     | splenic tuberculosis with concurrent PTB                    | 14 | 260       | 0.06        | 42.31          | 1.20* |
| female     | abdominal wall tuberculosis with concurrent PTB             | 15 | 143       | 0.03        | 41.96          | 1.19* |
| female     | tuberculosis of mediastinal lymph nodes with concurrent PTB | 16 | 2701      | 0.62        | 41.76          | 1.18* |
| female     | ankle joint tuberculosis with concurrent PTB                | 17 | 104       | 0.02        | 41.35          | 1.17* |
| female     | inguinal lymph node tuberculosis with concurrent            | 18 | 119       | 0.03        | 41.18          | 1.17* |



|        | PTB                                         |    |      |      |       |       |
|--------|---------------------------------------------|----|------|------|-------|-------|
| female | tuberculous peritonitis with concurrent PTB | 19 | 5733 | 1.31 | 41.11 | 1.16* |
| female | tuberculous meningitis with concurrent PTB  | 20 | 9809 | 2.23 | 40.59 | 1.15* |

In order to find out most of possible association rules in female, the minimum support degree was set as 0.02%, and the minimum confidence degree was set as 40.0%. After executing the association model, 20 association rules, including 2 rules whose confidence degree greater than 55% were obtained. In females, bronchial tuberculosis with concurrent PTB was the strongest association rule, followed by supraclavicular lymph node tuberculosis with concurrent PTB, cutaneous tuberculosis with concurrent PTB, etc.

Table S4. The association rules of concurrent PTB and EPTB in patients aged <15 years (Minsupport = 0.02%, Minconfidence = 3.0%)

| Consequent | Antecedent                                                  | ID | Instances | Support (%) | Confidence (%) | Lift  |
|------------|-------------------------------------------------------------|----|-----------|-------------|----------------|-------|
| age <15    | tuberculous meningitis with concurrent PTB                  | 1  | 9809      | 2.23        | 6.26           | 3.89* |
| age <15    | tuberculosis of axillary lymph nodes with concurrent PTB    | 2  | 593       | 0.14        | 6.07           | 3.78* |
| age <15    | cervical vertebra tuberculosis with concurrent PTB          | 3  | 155       | 0.04        | 5.81           | 3.61* |
| age <15    | hip joint tuberculosis with concurrent PTB                  | 4  | 339       | 0.08        | 5.31           | 3.30* |
| age <15    | tuberculosis of hilar lymph nodes with concurrent PTB       | 5  | 837       | 0.19        | 4.90           | 3.05* |
| age <15    | hepatic tuberculosis with concurrent PTB                    | 6  | 244       | 0.06        | 4.10           | 2.55* |
| age <15    | tuberculosis of mediastinal lymph nodes with concurrent PTB | 7  | 2701      | 0.62        | 3.55           | 2.21* |
| age <15    | abdominal wall tuberculosis with concurrent PTB             | 8  | 143       | 0.03        | 3.50           | 2.17* |
| age <15    | inguinal lymph node tuberculosis with concurrent PTB        | 9  | 119       | 0.03        | 3.36           | 2.09* |
| age <15    | tuberculous lymphadenitis of neck with concurrent PTB       | 10 | 6966      | 1.59        | 3.36           | 2.09* |
| age <15    | tuberculous myelitis with concurrent PTB                    | 11 | 163       | 0.04        | 3.07           | 1.91* |

In order to find out most of possible concurrent PTB and EPTB association rules in age <15 years, the minimum support degree was set as 0.02%, and the minimum confidence degree was set as 3.0%. After executing the association model, 11 association rules were obtained. In patients <15 years of age, tuberculous meningitis with concurrent PTB was the strongest association rule, followed by tuberculosis of axillary lymph nodes with concurrent PTB, etc.

Table S5. The association rules of concurrent PTB and EPTB in patients aged 15-24years (Minsupport = 0.02%, Minconfidence = 20%)

| Consequent  | Antecedent                                                  | ID | Instances | Support (%) | Confidence (%) | Lift  |
|-------------|-------------------------------------------------------------|----|-----------|-------------|----------------|-------|
| age = 15-24 | splenic tuberculosis with concurrent PTB                    | 1  | 260       | 0.06        | 36.92          | 2.23* |
| age = 15-24 | tuberculous myelitis with concurrent PTB                    | 2  | 163       | 0.04        | 36.20          | 2.18* |
| age = 15-24 | tuberculous peritonitis with concurrent PTB                 | 3  | 5733      | 1.31        | 32.04          | 1.93* |
| age = 15-24 | tuberculosis of abdominal lymph nodes with concurrent PTB   | 4  | 432       | 0.10        | 31.48          | 1.90* |
| age = 15-24 | pelvic tuberculosis with concurrent PTB                     | 5  | 785       | 0.18        | 29.81          | 1.80* |
| age = 15-24 | brain tuberculoma with concurrent PTB                       | 6  | 203       | 0.05        | 29.56          | 1.78* |
| age = 15-24 | hepatic tuberculosis with concurrent PTB                    | 7  | 244       | 0.06        | 29.51          | 1.78* |
| age = 15-24 | tuberculous lymphadenitis of neck with concurrent PTB       | 8  | 6966      | 1.59        | 29.33          | 1.77* |
| age = 15-24 | submaxillary lymph node tuberculosis with concurrent PTB    | 9  | 123       | 0.03        | 29.27          | 1.76* |
| age = 15-24 | abdominal wall tuberculosis with concurrent PTB             | 10 | 143       | 0.03        | 28.67          | 1.73* |
| age = 15-24 | tuberculous abscess of psoas major with concurrent PTB      | 11 | 169       | 0.04        | 28.40          | 1.71* |
| age = 15-24 | pleural tuberculoma with concurrent PTB                     | 12 | 416       | 0.09        | 27.64          | 1.67* |
| age = 15-24 | intestinal tuberculosis with concurrent PTB                 | 13 | 3380      | 0.77        | 27.60          | 1.66* |
| age = 15-24 | chest wall tuberculosis with concurrent PTB                 | 14 | 2243      | 0.51        | 27.42          | 1.65* |
| age = 15-24 | sacral tuberculosis with concurrent PTB                     | 15 | 95        | 0.02        | 27.37          | 1.65* |
| age = 15-24 | sacroiliac joint tuberculosis with concurrent PTB           | 16 | 292       | 0.07        | 26.71          | 1.61* |
| age = 15-24 | tuberculous polyserositis with concurrent PTB               | 17 | 2884      | 0.66        | 26.49          | 1.60* |
| age = 15-24 | tuberculous meningitis with concurrent PTB                  | 18 | 9809      | 2.23        | 26.22          | 1.58* |
| age = 15-24 | tuberculous empyema with concurrent PTB                     | 19 | 3783      | 0.86        | 26.20          | 1.58* |
| age = 15-24 | tuberculosis of axillary lymph nodes with concurrent PTB    | 20 | 593       | 0.14        | 23.95          | 1.44* |
| age = 15-24 | nasal tuberculosis with concurrent PTB                      | 21 | 107       | 0.02        | 23.36          | 1.41* |
| age = 15-24 | tuberculosis of mediastinal lymph nodes with concurrent PTB | 22 | 2701      | 0.62        | 22.29          | 1.34* |

|             |                                                             |    |       |       |       |       |
|-------------|-------------------------------------------------------------|----|-------|-------|-------|-------|
| age = 15-24 | supraclavicular lymph node tuberculosis with concurrent PTB | 23 | 169   | 0.04  | 21.89 | 1.32* |
| age = 15-24 | inguinal lymph node tuberculosis with concurrent PTB        | 24 | 119   | 0.03  | 21.85 | 1.32* |
| age = 15-24 | tuberculous pleurisy with concurrent PTB                    | 25 | 67400 | 15.35 | 20.10 | 1.21* |

In order to find out most of possible concurrent PTB and EPTB association rules in age 15-24 years, the minimum support degree was set as 0.02%, and the minimum confidence degree was set as 20.0%. After executing the association model, 25 association rules, including 4 rules whose confidence degree greater than 30% were obtained. In patients aged 15-24 years, splenic tuberculosis with concurrent PTB was the strongest association rule, followed by tuberculous myelitis with concurrent PTB, tuberculous peritonitis with concurrent PTB, etc.

Table S6. The association rules of concurrent PTB and EPTB in patients aged 25-34 years (Minsupport = 0.02%, Minconfidence = 20%)

| Consequent  | Antecedent                                                  | ID | Instances | Support (%) | Confidence (%) | Lift  |
|-------------|-------------------------------------------------------------|----|-----------|-------------|----------------|-------|
| age = 25-34 | oviduct tuberculosis with concurrent PTB                    | 1  | 100       | 0.02        | 53.00          | 3.09* |
| age = 25-34 | endometrial tuberculosis with concurrent PTB                | 2  | 129       | 0.03        | 37.21          | 2.17* |
| age = 25-34 | pelvic tuberculosis with concurrent PTB                     | 3  | 785       | 0.18        | 36.82          | 2.15* |
| age = 25-34 | tuberculous lymphadenitis of neck with concurrent PTB       | 4  | 6966      | 1.59        | 29.26          | 1.71* |
| age = 25-34 | submaxillary lymph node tuberculosis with concurrent PTB    | 5  | 123       | 0.03        | 26.83          | 1.56* |
| age = 25-34 | cutaneous tuberculosis with concurrent PTB                  | 6  | 392       | 0.09        | 25.51          | 1.49* |
| age = 25-34 | sacroiliac joint tuberculosis with concurrent PTB           | 7  | 292       | 0.07        | 25.34          | 1.48* |
| age = 25-34 | pleural tuberculoma with concurrent PTB                     | 8  | 416       | 0.09        | 25.24          | 1.47* |
| age = 25-34 | supraclavicular lymph node tuberculosis with concurrent PTB | 9  | 169       | 0.04        | 24.85          | 1.45* |
| age = 25-34 | bronchial tuberculosis with concurrent PTB                  | 10 | 27549     | 6.28        | 24.56          | 1.43* |
| age = 25-34 | nasal tuberculosis with concurrent PTB                      | 11 | 107       | 0.02        | 24.30          | 1.42* |
| age = 25-34 | tuberculosis of abdominal lumph nodes with concurrent PTB   | 12 | 432       | 0.10        | 23.38          | 1.36* |
| age = 25-34 | tuberculous abscess of psoas major with concurrent PTB      | 13 | 169       | 0.04        | 23.08          | 1.35* |
| age = 25-34 | hepatic tuberculosis with concurrent PTB                    | 14 | 244       | 0.06        | 22.95          | 1.34* |
| age = 25-34 | chest wall tuberculosis with concurrent PTB                 | 15 | 2243      | 0.51        | 22.87          | 1.33* |
| age = 25-34 | ureteric tuberculosis with concurrent PTB                   | 16 | 92        | 0.02        | 22.83          | 1.33* |
| age = 25-34 | costal tuberculosis with concurrent PTB                     | 17 | 88        | 0.02        | 22.73          | 1.33* |
| age = 25-34 | inguinal lymph node tuberculosis with concurrent PTB        | 18 | 119       | 0.03        | 22.69          | 1.32* |
| age = 25-34 | pharyngeal/Laryngeal tuberculosis with concurrent PTB       | 19 | 2173      | 0.50        | 22.60          | 1.32* |
| age = 25-34 | tuberculosis of axillary lymph nodes with concurrent PTB    | 20 | 593       | 0.14        | 22.43          | 1.31* |
| age = 25-34 | intestinal Tuberculosis with concurrent PTB                 | 21 | 3380      | 0.77        | 22.28          | 1.30* |
| age = 25-34 | tuberculous peritonitis with concurrent PTB                 | 22 | 5733      | 1.31        | 22.19          | 1.29* |

|             |                                                  |    |      |      |       |       |
|-------------|--------------------------------------------------|----|------|------|-------|-------|
| age = 25-34 | splenic tuberculosis with concurrent PTB         | 23 | 260  | 0.06 | 21.15 | 1.23* |
| age = 25-34 | abdominal wall tuberculosis with concurrent PTB  | 24 | 143  | 0.03 | 20.98 | 1.22* |
| age = 25-34 | tuberculous myelitis with concurrent PTB         | 25 | 163  | 0.04 | 20.86 | 1.22* |
| age = 25-34 | tuberculous meningitis with concurrent PTB       | 26 | 9809 | 2.23 | 20.66 | 1.20* |
| age = 25-34 | elbow joint tuberculosis with concurrent PTB     | 27 | 97   | 0.02 | 20.62 | 1.20* |
| age = 25-34 | lumbar vertebra tuberculosis with concurrent PTB | 28 | 2564 | 0.58 | 20.28 | 1.18* |

In order to find out most of possible concurrent PTB and EPTB association rules in age 25-34 years, the minimum support degree was set as 0.02%, and the minimum confidence degree was set as 20.0%. After executing the association model, 28 association rules, including 3 rules whose confidence degree greater than 30% were obtained. In patients aged 25-34, oviduct tuberculosis with concurrent PTB was the strongest association rule, followed by endometrial tuberculosis with concurrent PTB, etc.

Table S7. The association rules of concurrent PTB and EPTB in patients aged 35-44 years (Minsupport = 0.02%, Minconfidence = 15%)

| Consequent  | Antecedent                                                  | ID | Instances | Support (%) | Confidence (%) | Lift  |
|-------------|-------------------------------------------------------------|----|-----------|-------------|----------------|-------|
| age = 35-44 | oviduct tuberculosis with concurrent PTB                    | 1  | 100       | 0.02        | 22.00          | 1.71* |
| age = 35-44 | endometrial tuberculosis with concurrent PTB                | 2  | 129       | 0.03        | 21.71          | 1.69* |
| age = 35-44 | ureteric tuberculosis with concurrent PTB                   | 3  | 92        | 0.02        | 19.57          | 1.52* |
| age = 35-44 | epididymal tuberculosis with concurrent PTB                 | 4  | 359       | 0.08        | 19.22          | 1.50* |
| age = 35-44 | testicular tuberculosis with concurrent PTB                 | 5  | 271       | 0.06        | 19.19          | 1.50* |
| age = 35-44 | knee joint tuberculosis with concurrent PTB                 | 6  | 468       | 0.11        | 19.02          | 1.48* |
| age = 35-44 | ankle joint tuberculosis with concurrent PTB                | 7  | 104       | 0.02        | 18.27          | 1.42* |
| age = 35-44 | brain tuberculoma with concurrent PTB                       | 8  | 203       | 0.05        | 18.23          | 1.42* |
| age = 35-44 | adrenal tuberculosis with concurrent PTB                    | 9  | 156       | 0.04        | 17.95          | 1.40* |
| age = 35-44 | inguinal lymph node tuberculosis with concurrent PTB        | 10 | 119       | 0.03        | 17.65          | 1.38* |
| age = 35-44 | pelvic tuberculosis with concurrent PTB                     | 11 | 785       | 0.18        | 16.18          | 1.26* |
| age = 35-44 | pharyngeal/laryngeal tuberculosis with concurrent PTB       | 12 | 2173      | 0.50        | 16.01          | 1.25* |
| age = 35-44 | supraclavicular lymph node tuberculosis with concurrent PTB | 13 | 169       | 0.04        | 15.98          | 1.24* |
| age = 35-44 | vocal cord tuberculosis with concurrent PTB                 | 14 | 97        | 0.02        | 15.46          | 1.21* |
| age = 35-44 | bronchial tuberculosis with concurrent PTB                  | 15 | 27549     | 6.28        | 15.20          | 1.18* |
| age = 35-44 | cutaneous tuberculosis with concurrent PTB                  | 16 | 392       | 0.09        | 15.05          | 1.17* |

In order to find out most of possible concurrent PTB and EPTB association rules in age 35-44 years, the minimum support degree was set as 0.02%, and the minimum confidence degree was set as 15.0%. After executing the association model, 16 association rules, including 2 rules whose confidence degree greater than 20% were obtained. In patients aged 35-44 years, the strongest association rule was oviduct tuberculosis with concurrent PTB, followed by endometrial tuberculosis with concurrent PTB, etc.

Table S8. The association rules of concurrent PTB and EPTB in patients aged 45-54 years (Minsupport = 0.02%, Minconfidence = 15%)

| Consequent  | Antecedent                                            | ID | Instances | Support (%) | Confidence (%) | Lift  |
|-------------|-------------------------------------------------------|----|-----------|-------------|----------------|-------|
| age = 45-54 | vocal cord tuberculosis with concurrent PTB           | 1  | 97        | 0.02        | 25.77          | 1.61* |
| age = 45-54 | wrist joint tuberculosis with concurrent PTB          | 2  | 147       | 0.03        | 25.17          | 1.57* |
| age = 45-54 | adrenal tuberculosis with concurrent PTB              | 3  | 156       | 0.04        | 25.00          | 1.56* |
| age = 45-54 | ureteric tuberculosis with concurrent PTB             | 4  | 92        | 0.02        | 22.83          | 1.42* |
| age = 45-54 | nasal tuberculosis with concurrent PTB                | 5  | 107       | 0.02        | 19.63          | 1.22* |
| age = 45-54 | renal tuberculosis with concurrent PTB                | 6  | 1202      | 0.27        | 19.38          | 1.21* |
| age = 45-54 | epididymal tuberculosis with concurrent PTB           | 7  | 359       | 0.08        | 18.66          | 1.16* |
| age = 45-54 | elbow joint tuberculosis with concurrent PTB          | 8  | 97        | 0.02        | 18.56          | 1.16* |
| age = 45-54 | hip joint tuberculosis with concurrent PTB            | 9  | 339       | 0.08        | 17.99          | 1.12* |
| age = 45-54 | pharyngeal/laryngeal tuberculosis with concurrent PTB | 10 | 2173      | 0.50        | 17.76          | 1.11* |
| age = 45-54 | knee joint tuberculosis with concurrent PTB           | 11 | 468       | 0.11        | 17.74          | 1.11* |
| age = 45-54 | testicular tuberculosis with concurrent PTB           | 12 | 271       | 0.06        | 17.34          | 1.08* |
| age = 45-54 | abdominal wall tuberculosis with concurrent PTB       | 13 | 143       | 0.03        | 16.78          | 1.05* |
| age = 45-54 | tuberculous empyema with concurrent PTB               | 14 | 3783      | 0.86        | 15.99          | 1.00* |
| age = 45-54 | sacroiliac joint tuberculosis with concurrent PTB     | 15 | 292       | 0.07        | 15.07          | 0.94  |

In order to find out most of possible concurrent PTB and EPTB association rules in age 45-54 years, the minimum support degree was set as 0.02%, and the minimum confidence degree was set as 15.0%. After executing the association model, 15 association rules, including 4 rules whose confidence degree greater than 20% were obtained. In patients aged 45-54 years, the strongest association rule was vocal cord tuberculosis with concurrent PTB, followed by wrist joint tuberculosis with concurrent PTB, etc.



Table S9. The association rules of concurrent PTB and EPTB in patients aged 55-64 years (Minsupport = 0.02%, Minconfidence = 15%)

| Consequent  | Antecedent                                                  | ID | Instances | Support (%) | Confidence (%) | Lift  |
|-------------|-------------------------------------------------------------|----|-----------|-------------|----------------|-------|
| age = 55-64 | ankle joint tuberculosis with concurrent PTB                | 1  | 104       | 0.02        | 25.00          | 1.55* |
| age = 55-64 | adrenal tuberculosis with concurrent PTB                    | 2  | 156       | 0.04        | 24.36          | 1.51* |
| age = 55-64 | shoulder joint tuberculosis with concurrent PTB             | 3  | 103       | 0.02        | 22.33          | 1.38* |
| age = 55-64 | vocal cord tuberculosis with concurrent PTB                 | 4  | 97        | 0.02        | 20.62          | 1.28* |
| age = 55-64 | testicular tuberculosis with concurrent PTB                 | 5  | 271       | 0.06        | 18.45          | 1.14* |
| age = 55-64 | hip joint tuberculosis with concurrent PTB                  | 6  | 339       | 0.08        | 18.29          | 1.13* |
| age = 55-64 | tuberculosis of hilar lymph nodes with concurrent PTB       | 7  | 837       | 0.19        | 17.92          | 1.11* |
| age = 55-64 | knee joint tuberculosis with concurrent PTB                 | 8  | 468       | 0.11        | 17.74          | 1.10* |
| age = 55-64 | cervical vertebra tuberculosis with concurrent PTB          | 9  | 155       | 0.04        | 17.42          | 1.08* |
| age = 55-64 | renal tuberculosis with concurrent PTB                      | 10 | 1202      | 0.27        | 16.64          | 1.03* |
| age = 55-64 | thoracic vertebra tuberculosis with concurrent PTB          | 11 | 2446      | 0.56        | 16.52          | 1.02* |
| age = 55-64 | tuberculous pericarditis with concurrent PTB                | 12 | 3399      | 0.77        | 16.45          | 1.02* |
| age = 55-64 | wrist joint tuberculosis with concurrent PTB                | 13 | 147       | 0.03        | 15.65          | 0.97  |
| age = 55-64 | tuberculosis of mediastinal lymph nodes with concurrent PTB | 14 | 2701      | 0.62        | 15.55          | 0.96  |

In order to find out most of possible concurrent PTB and EPTB association rules in age 55-64 years, the minimum support degree was set as 0.02%, and the minimum confidence degree was set as 15.0%. After executing the association model, 14 association rules, including 4 rules whose confidence degree greater than 20% were obtained. In TB patients aged 55-64 years, the strongest association rule was ankle joint tuberculosis with concurrent PTB, followed by adrenal tuberculosis with concurrent PTB, etc.

Table S10. The association rules of concurrent PTB and EPTB in patients aged  $\geq 65$  years (Minsupport = 0.02%, Minconfidence = 15%)

| Consequent    | Antecedent                                              | ID | Instances | Support (%) | Confidence (%) | Lift  |
|---------------|---------------------------------------------------------|----|-----------|-------------|----------------|-------|
| age $\geq 65$ | tuberculous pericarditis with concurrent PTB            | 1  | 3399      | 0.77        | 27.95          | 1.42* |
| age $\geq 65$ | tuberculosis of hilar lymph nodes with concurrent PTB   | 2  | 837       | 0.19        | 25.45          | 1.30* |
| age $\geq 65$ | shoulder joint tuberculosis with concurrent PTB         | 3  | 103       | 0.02        | 25.24          | 1.29* |
| age $\geq 65$ | cervical vertebra tuberculosis with concurrent PTB      | 4  | 155       | 0.04        | 22.58          | 1.15* |
| age $\geq 65$ | thoracic vertebra tuberculosis with concurrent PTB      | 5  | 2446      | 0.56        | 21.10          | 1.07* |
| age $\geq 65$ | ankle joint tuberculosis with concurrent PTB            | 6  | 104       | 0.02        | 20.19          | 1.03* |
| age $\geq 65$ | lumbar vertebra tuberculosis with concurrent PTB        | 7  | 2564      | 0.58        | 19.73          | 1.01* |
| age $\geq 65$ | wrist joint tuberculosis with concurrent PTB            | 8  | 147       | 0.03        | 19.73          | 1.00* |
| age $\geq 65$ | tuberculous pleurisy with concurrent PTB                | 9  | 67400     | 15.35       | 19.60          | 1.00* |
| age $\geq 65$ | elbow joint tuberculosis with concurrent PTB            | 10 | 97        | 0.02        | 19.59          | 1.00* |
| age $\geq 65$ | mediastinal lymph node tuberculosis with concurrent PTB | 11 | 2701      | 0.62        | 18.92          | 0.96  |
| age $\geq 65$ | costal tuberculosis with concurrent PTB                 | 12 | 88        | 0.02        | 18.18          | 0.93  |
| age $\geq 65$ | tuberculous polyserositis with concurrent PTB           | 13 | 2884      | 0.66        | 17.79          | 0.91  |
| age $\geq 65$ | sacral tuberculosis with concurrent PTB                 | 14 | 95        | 0.02        | 16.84          | 0.86  |
| age $\geq 65$ | knee joint tuberculosis with concurrent PTB             | 15 | 468       | 0.11        | 16.24          | 0.83  |

In order to find out most of possible concurrent PTB and EPTB association rules in  $\geq 65$  years, the minimum support degree was set as 0.02%, and the minimum confidence degree was set as 15.0%. After executing the association model, 15 association rules, including 6 rules whose confidence degree greater than 20% were obtained. In TB patients aged  $\geq 65$  years,

the strongest association rule was tuberculous pericarditis with concurrent PTB, followed by hilar lymph nodes with concurrent PTB, etc.

Notes: The first column represents the consequents (the "then" part of the rule), while the next column represents the antecedents (the "if" part of the rule).

ID displays the sequence of the association rules.

Instances display the cases of TB.

\*:  $\text{lift} \geq 1$
